# Supplementary material for: Base pair specificity and energetics of binding of the phenazinium molecules phenosafranine and safranine-O to deoxyribonucleic acids: a comparative study
Source: Royal Society of Chemistry journal article supplement (doi:10.1039/c001062f), 2010-01-01
Supplement: c001062f.pdf [file c001062f.pdf]

## Electronic Supplementary information

Table S1

| Summary of the optical properties of free and DNA bound dyes <sup>a</sup> |                                |                              |
|---------------------------------------------------------------------------|--------------------------------|------------------------------|
| Parameter                                                                 | PSF                            | SO                           |
| <b>Absorbance</b>                                                         |                                |                              |
| $\lambda_{\max}$ (free)                                                   | 520                            | 521                          |
| $\lambda_{\max}$ (bound)                                                  | 536                            | 536                          |
| $\epsilon_f$ (at $\lambda_{\max}$ )                                       | 33,000                         | 25,000                       |
| $\lambda_{\text{iso}}^b$                                                  | 538 (CP)/539 (CT) and 541 (ML) | 537 (CP) and 538 (CT and ML) |
| $\epsilon_b$ (at $\lambda_{\max}$ ) with                                  |                                |                              |
| CP DNA                                                                    | 20,845                         | 16,570                       |
| CT DNA                                                                    | 21,285                         | 16,540                       |
| ML DNA                                                                    | 20,185                         | 15,520                       |
| <b>Fluorescence</b>                                                       |                                |                              |
| $\lambda_{\max}$ (excitation)                                             | 520                            | 521                          |
| $\lambda_{\max}$ (emission)                                               | 571                            | 572                          |

<sup>a</sup>Units:  $\lambda$  nm;  $\epsilon$  (molar extinction coefficient)  $\text{M}^{-1} \text{cm}^{-1}$ .

<sup>b</sup>Wavelengths at the isosbestic points.

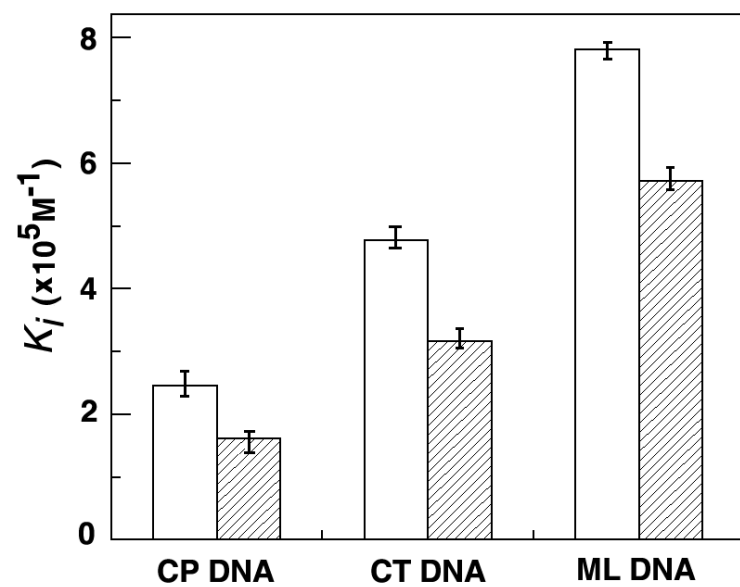

**Fig. S1**

Fig. S1. A comparative ordinal data of the binding affinity of PSF and SO to CP, CT and ML DNA

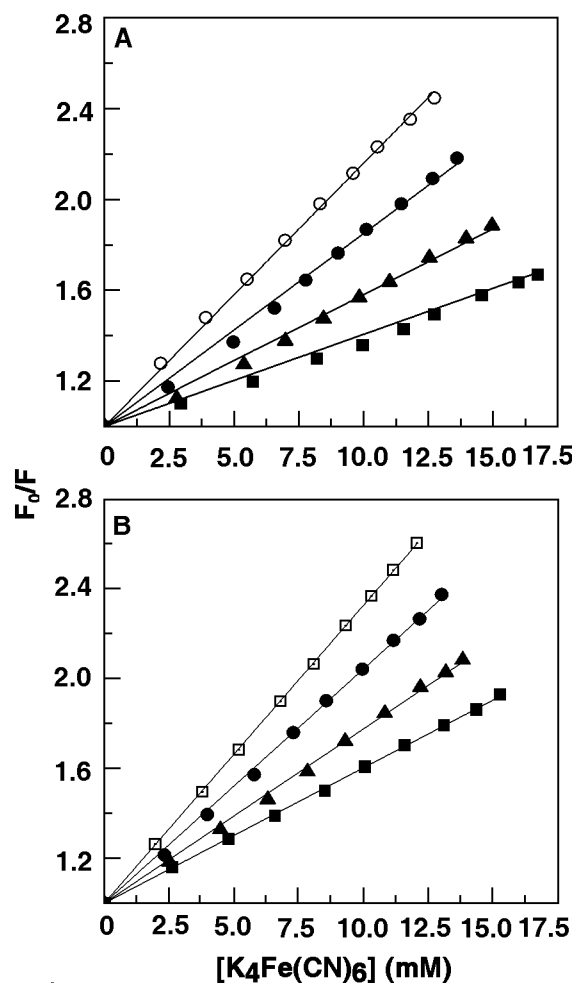

Fig. S2

Fig. S2. Stern-Volmer plots for the quenching of (A) PSF (o), and complexes of PSF with CP (●), CT (▲), ML (■) and (B) SO (□) and complexes of SO with CP (●), CT (▲), ML (■) with increasing concentration of  $[Fe(CN)_6]^{4-}$  ion in 10 mM sodium cacodylate buffer, pH 7.0, at  $20 \pm 1.0$  °C. Concentration of the dye, DNAs and  $[K^+]$  ion were kept constant. The Stern-Volmer quenching constants for PSF and SO and their complexes with CP, CT and ML DNA were 29.0, 21.0, 14.4 and 10.0  $L mol^{-1}$  and 32.5, 25.5, 19.0 and 14.8  $L mol^{-1}$  respectively.

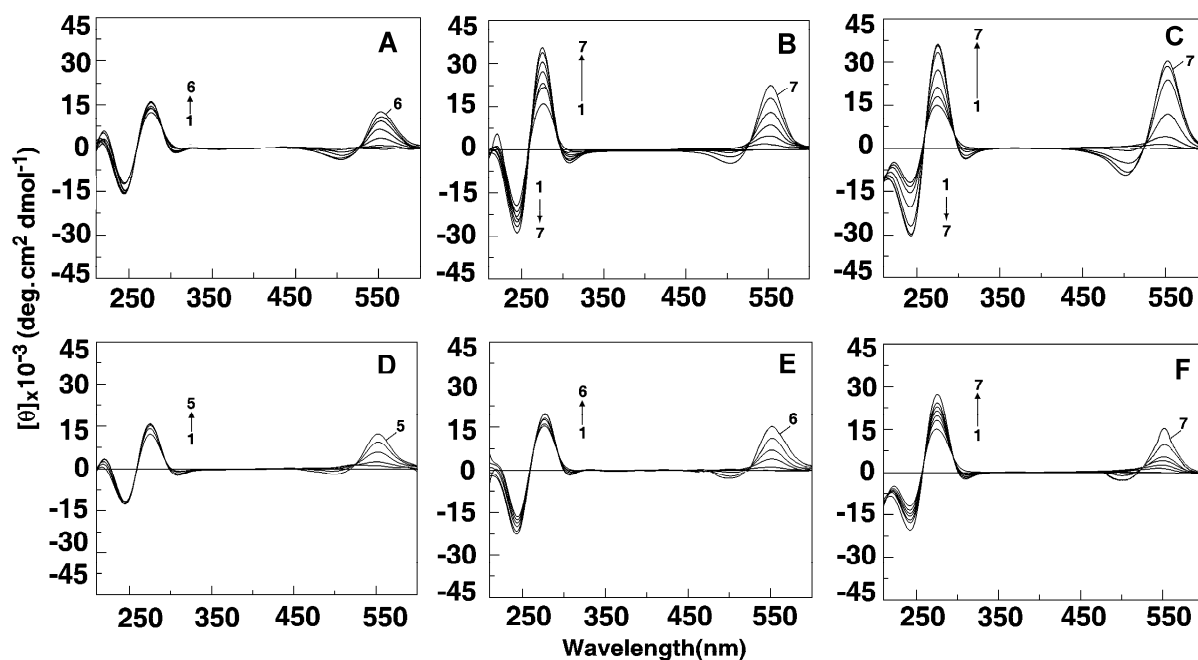

Fig. S3

Fig. S3. Representative intrinsic circular dichroic spectra of (A) 60  $\mu\text{M}$  of CP DNA with 0, 12, 24, 48, 54, 60  $\mu\text{M}$  of PSF (curves 1-6) (B) 60  $\mu\text{M}$  of CT DNA with 0, 12, 18, 24, 30, 36, 42  $\mu\text{M}$  of PSF (curves 1-7) and (C) 60  $\mu\text{M}$  of ML DNA with 0, 6, 12, 18, 24, 30, 36  $\mu\text{M}$  of PSF (curves 1-7) (D) 60  $\mu\text{M}$  of CP DNA with 0, 18, 30, 54, 66  $\mu\text{M}$  of SO (curves 1-5) (E) 60  $\mu\text{M}$  of CT DNA with 0, 6, 18, 24, 42  $\mu\text{M}$  of SO (curves 1-6) (F) 60  $\mu\text{M}$  of ML DNA with 0, 6, 12, 18, 24, 36, 42  $\mu\text{M}$  of SO (curves 1-7). The expressed molar ellipticity ( $\theta$ ) values are based on the DNA concentration.
